# Supplementary material for: Synthesis of ionic liquid-modified BiPO4 microspheres with hierarchical flower-like architectures and enhanced photocatalytic activity
Source: Royal Society of Chemistry journal article supplement (doi:10.1039/c5ra14626g), 2015-01-01
Supplement: c5ra14626g1.pdf [file c5ra14626g1.pdf]

**Synthesis of ionic liquid-modified BiPO<sub>4</sub> microspheres with  
hierarchical flower-like architectures and enhanced photocatalytic  
activity**

Hua Lv, Jing Guang, Yumin Liu,\* Haibo Tang, Peng Zhang, Yan Lu, Jianji Wang\*

Collaborative Innovation Center of Henan Province for Green Manufacturing of Fine Chemicals,  
Key Laboratory of Green Chemical Media and Reactions, Ministry of Education, School of  
Chemistry and Chemical Engineering, Henan Normal University, Xinxiang, Henan 453007, P. R.  
China. E-mail: hualv2009@163.com (Y Liu); jwang@htu.cn (J Wang); Tel: +86 373 3326335;  
Fax: +86 373 3326336.

\* To whom correspondence should be addressed. Tel: +86 373 3326335; Fax: +86 373 3326336.

E-mail addresses: hualv2009@163.com (Y Liu); jwang@htu.cn (J Wang).



Fig. S1 SEM images of  $\text{BiPO}_4$  prepared in the presence of (a) 1-Butyl-1-methylpyrrolidinium hexafluorophosphate, (b) 1-Butyl-1-methylpiperidinium hexafluorophosphate, (c) 1-ethyl-3-methylimidazolium hexafluorophosphate, (d) 1-octyl-3-methylimidazolium hexafluorophosphate.



Fig. S2 SEM image of BiPO<sub>4</sub> synthesized with the molar ratio of [[C<sub>4</sub>mim][PF<sub>6</sub>]] : [Bi(NO<sub>3</sub>)<sub>3</sub>] =

1.5:1.



Fig. S3 SEM image of  $\text{BiPO}_4$  prepared by hydrothermal reaction of bismuth nitrate with  $[\text{C}_4\text{mim}][\text{PF}_6]$  in water at 160 °C for 24 h.



Fig. S4 SEM image of IL-BiPO<sub>4</sub> prepared at 160 °C for (a) 1 min, (b) 5 min, (c) 10 min (d) 15 min.



Fig. S5 FT-IR spectra of (a) NH-BiPO<sub>4</sub>, (b) IL-BiPO<sub>4</sub> and (c) [C<sub>4</sub>mim][PF<sub>6</sub>].



Fig. S6 UV-vis diffuse reflectance spectra and  $(ah\nu)^{1/2}$  versus the energy of absorbed light (inset)

of IL-BiPO<sub>4</sub> and NH-BiPO<sub>4</sub>.



Fig. S7 Cycling runs in photocatalytic decolorization of RhB by IL-BiPO<sub>4</sub>.
